# Supplementary material for: Optical and Flame-Retardant Properties of a Series of Polyimides Containing Side Chained Bulky Phosphaphenanthrene Units
Source: MDPI journal article supplement (doi:10.3390/ijms232113174), 2022-10-29
Supplement: s1 [file s1]

***SUPPORTING INFORMATION* for**

**Optical and Flame-Retardant Properties of a Series of Polyimides Containing  
Side Chained Bulky Phosphaphenanthrene Units**

Mihaela Homocianu <sup>1</sup>, Diana Serbezeanu <sup>1</sup>, Tăchiță Vlad-Bubulac <sup>1\*</sup>, Mihai Brebu <sup>1</sup> and  
Gabriela Lisa <sup>2</sup>

<sup>1</sup> “Petru Poni” Institute of Macromolecular Chemistry, Aleea Gr. Ghica Voda, 41A, 700487 Iasi,  
Romania

<sup>2</sup> Department of Chemical Engineering, Faculty of Chemical Engineering and Environmental  
Protection, Gheorghe Asachi Technical University of Iasi, Bd. Mangeron 73, 700050 Iasi,  
Romania

\* Correspondence: [tvlabdb@icmpp.ro](mailto:tvlabdb@icmpp.ro)

**Figure S1.** Absorption spectra of **PI (1-4)** in  $\text{CHCl}_3$  (a), NMP (b) and DMAc (c) solutions.

**Figure S2.** Emission spectra of **PI-2 (a)**, **PI-3 (b)**, and **PI-4 (c)** in DMF solution.

**Figure S3.** Emission spectra of **PI-1 (a)**, **PI-2 (b)**, **PI-3 (c)**, **PI-4 (d)**, in  $\text{CHCl}_3$  solution

**Figure S4.** Emission spectra of **PI-1 (a)**, **PI-2 (b)**, and **PI-3 (c)** in NMP solution.

**Figure S5.** Emission spectra of **PI-1 (a)**, **PI-3 (b)**, and **PI-4 (c)** in DMAc solution.

**Figure S6.** Transmission spectra for **PI (1-4)** prepared thin films.

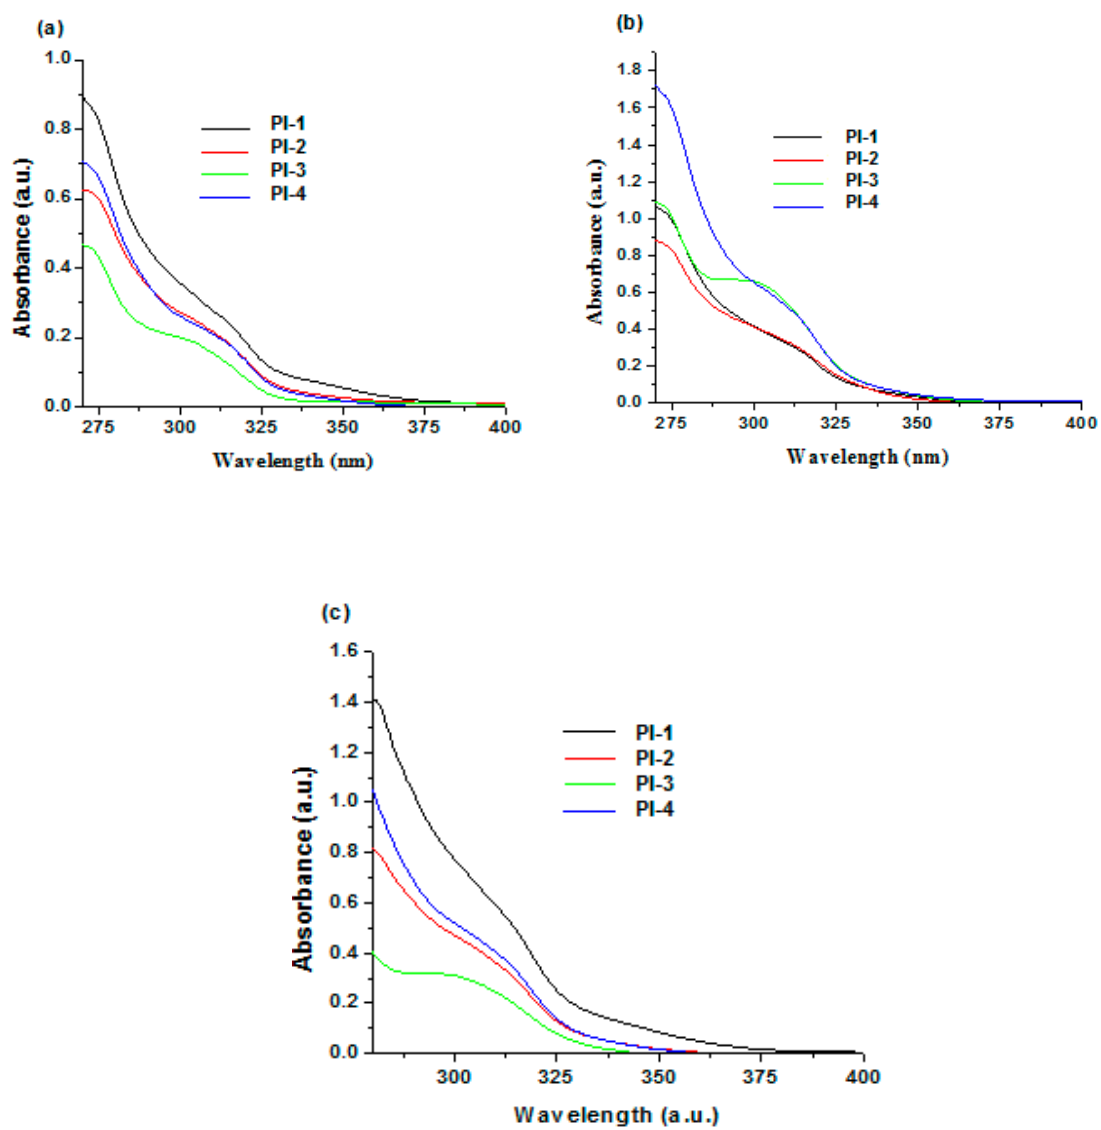

**Figure S1.** Absorption spectra of **PI (1-4)** in  $\text{CHCl}_3$  (a), NMP (b) and DMAc (c) solutions.

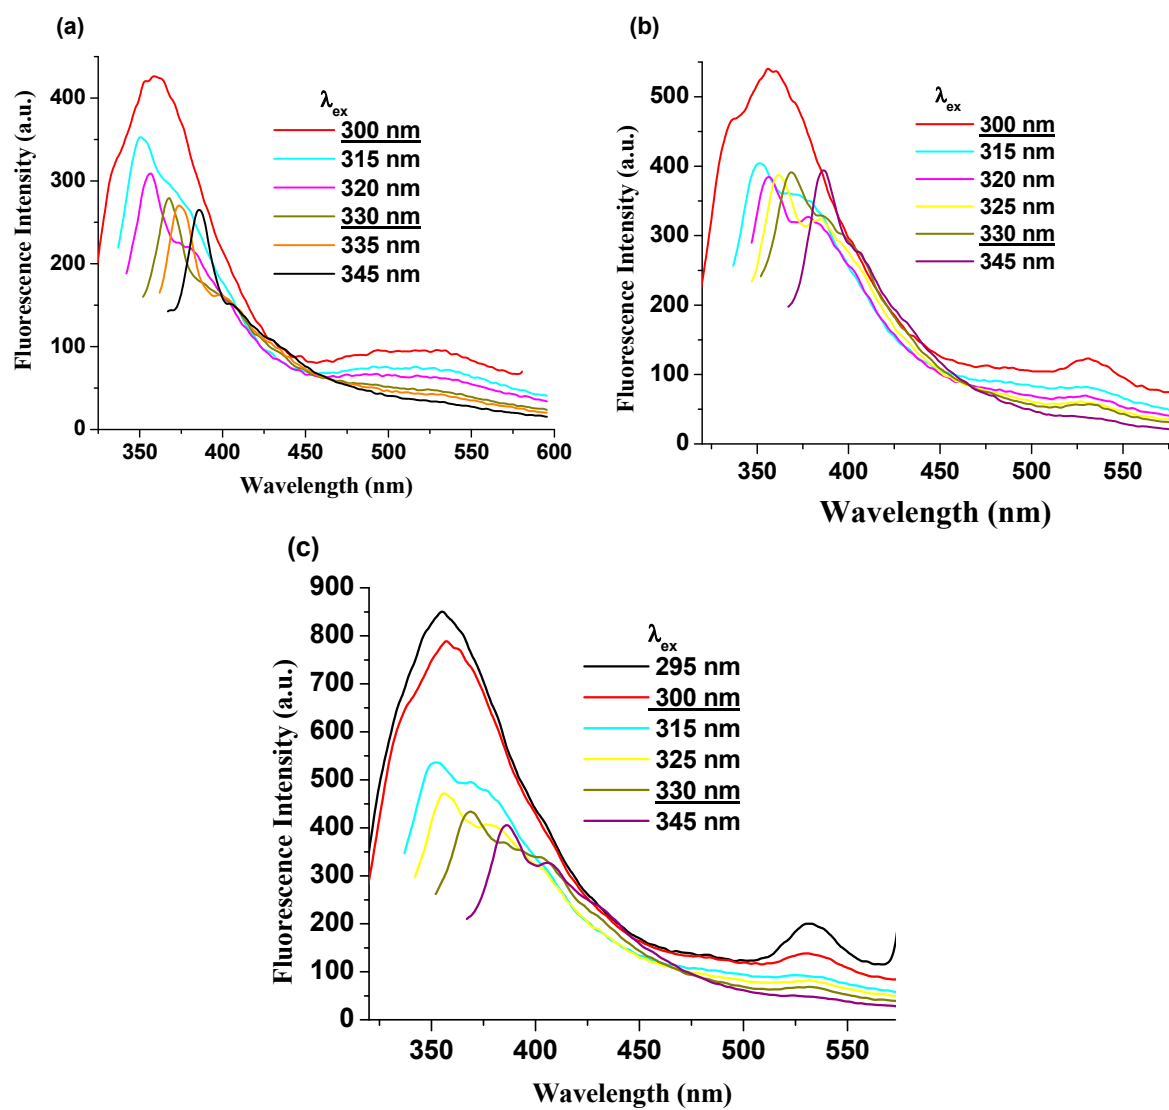

**Figure S2.** Emission spectra of PI-2 (a), PI-3 (b), and PI-4 (c) in DMF solution.

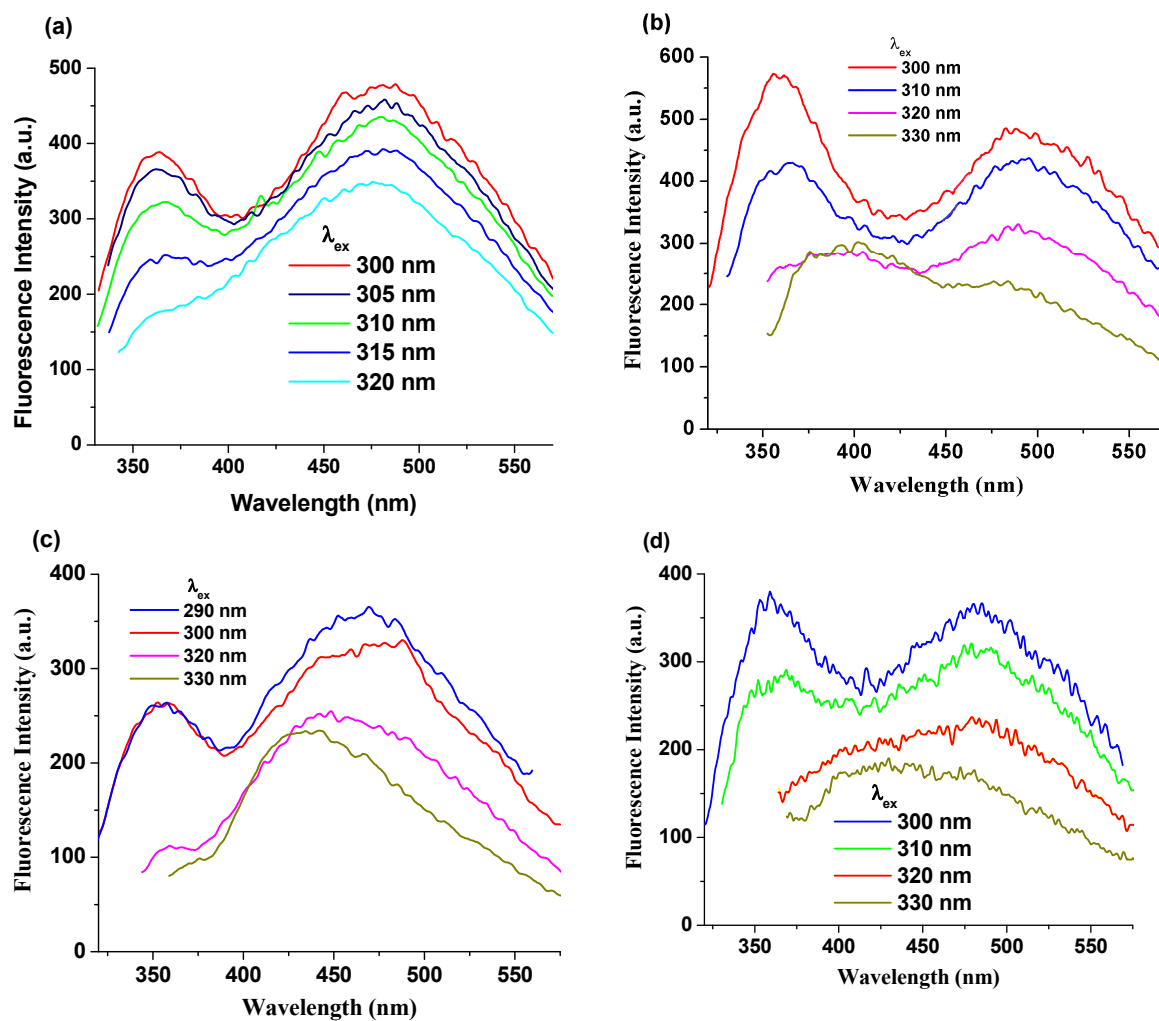

**Figure S3.** Emission spectra of PI-1 (a), PI-2 (b), PI-3 (c), PI-4 (d), in  $\text{CHCl}_3$  solution

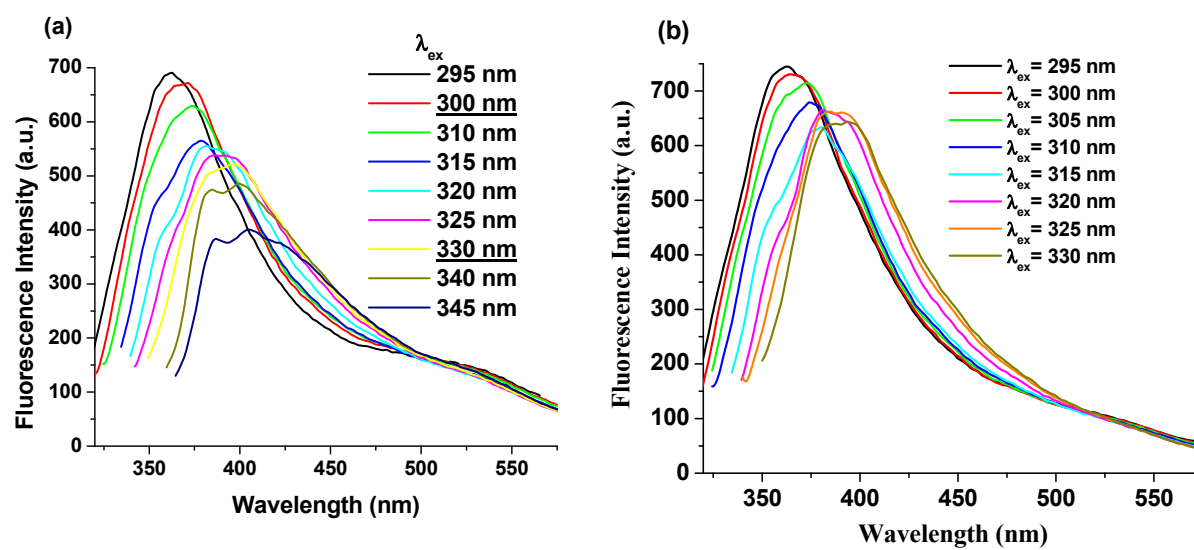

**Figure S4.** Emission spectra of PI-1 (a), PI-2 (b), and PI-3 (c) in NMP solution.

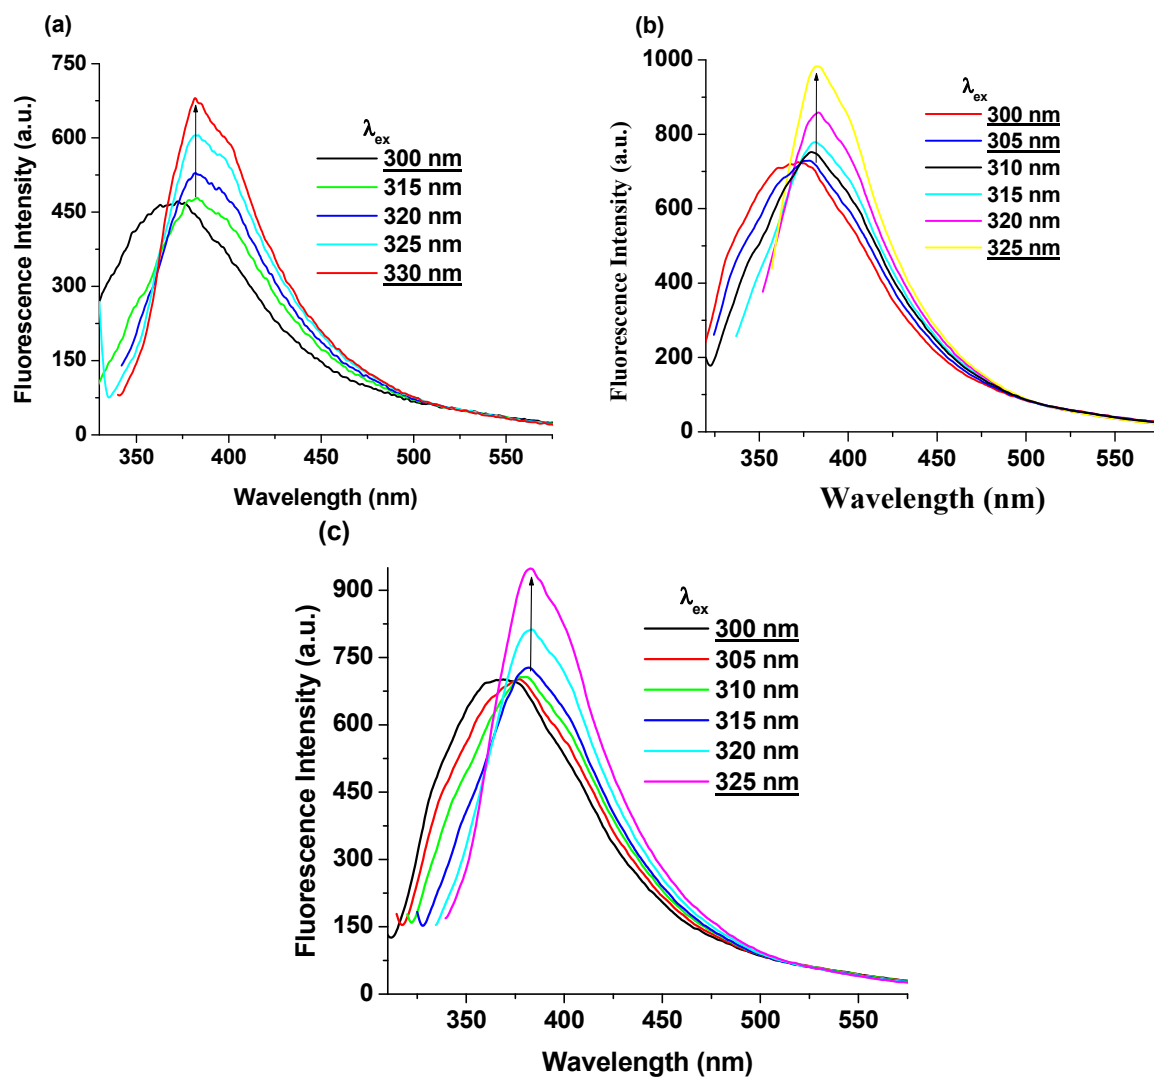

**Figure S5.** Emission spectra of PI-1 (a), PI-3 (b), and PI-4 (c) in DMAc solution.

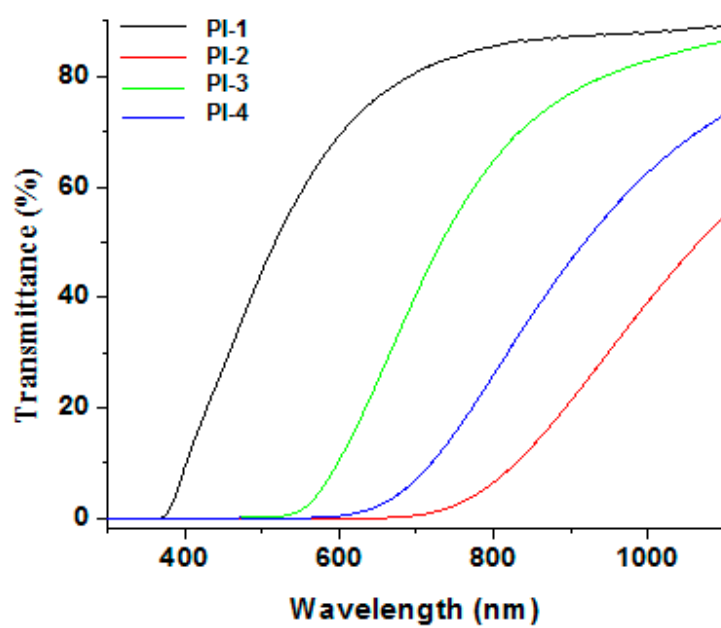

**Figure S6.** Transmission spectra for **PI (1-4)** prepared thin films
